# Supplementary material for: Altered germline cyst formation and oogenesis in Tex14 mutant mice
Source: PubMed Central journal article supplement (PMC8249907; doi:10.1242/bio.058807), 2021-06-22
Supplement: biolopen-10-058807-s1.pdf [file biolopen-10-058807-s1.pdf]

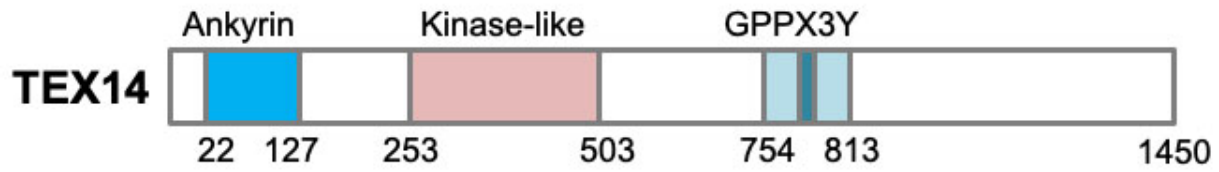

**Fig S1. Motifs of the mouse TEX14 protein.** (Adapted from Iwamori T et al., Molecular and Cellular Biology, 2010; 30(9):2280-92).

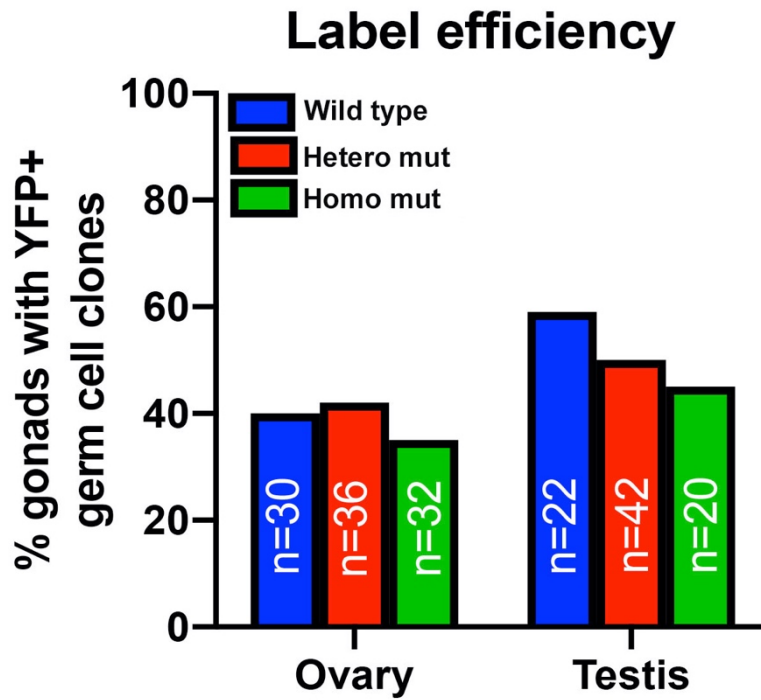

**Fig S2. Single-PGC lineage labeling efficiency.** The efficiency of single PGC-lineage labeling shown by the percentage of fetal gonads containing YFP positive germ cell clones in wild type and *Tex14* mutant mouse fetal gonads.

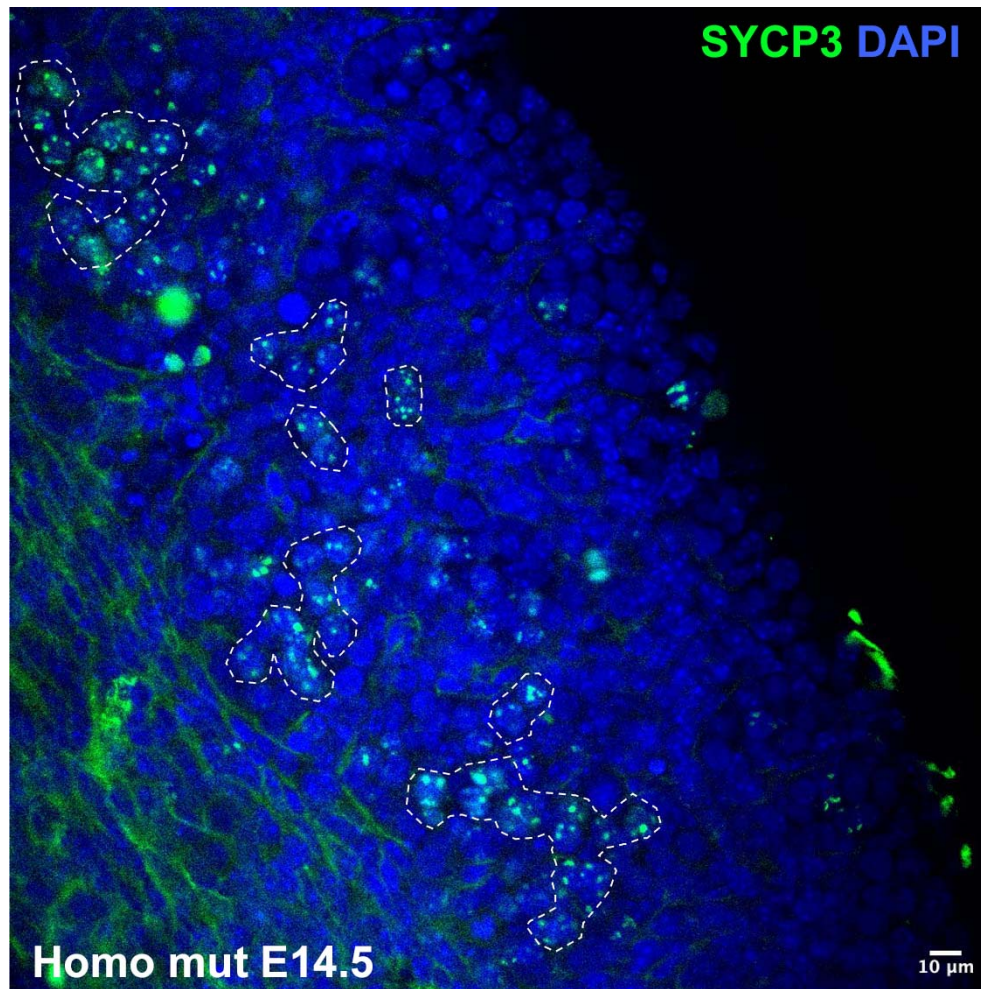

**Fig S3. Clustered SYCP3-positive cells observed in the E14.5 homozygous mutant ovary.** (n=6 ovaries).

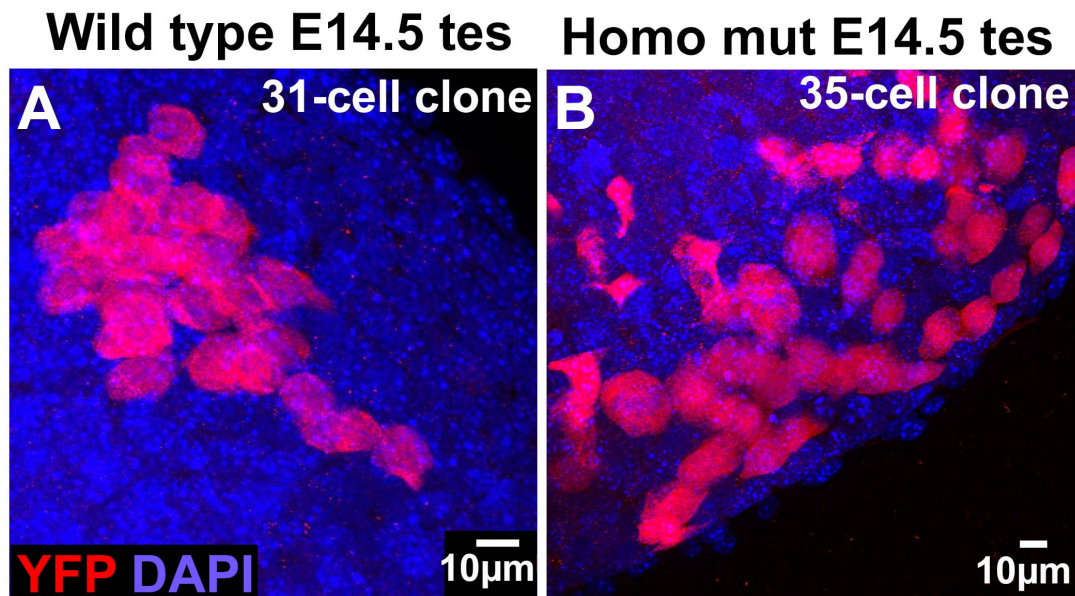

**Fig S4. The germ cell clone revealed by single-PGC lineage tracing in E14.5 testes.** (A) A YFP-positive germ cell clone containing a germline cyst in the E14.5 wild type testis (n=22 testes). (B) A YFP-positive germ cell clone containing many smaller cysts in the E14.5 homozygous mutant testis (n=20 testes).

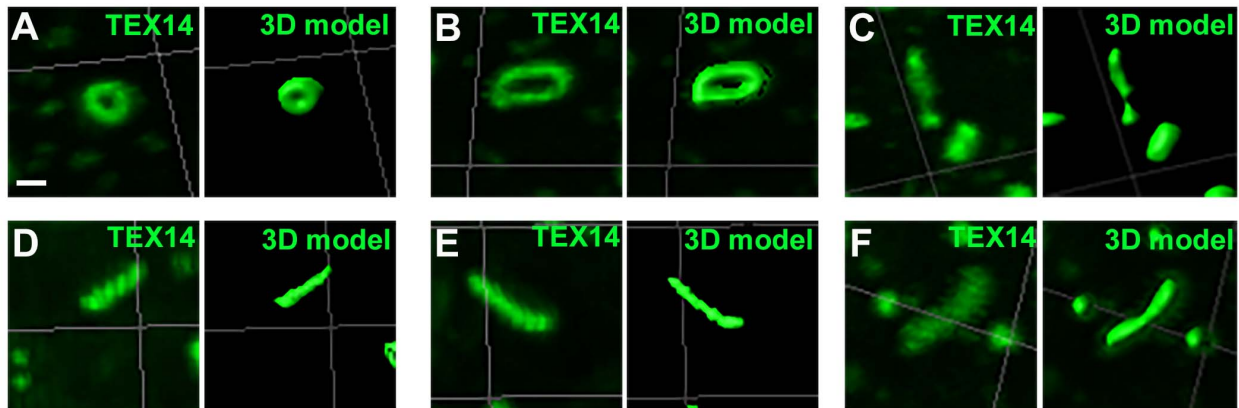

**Fig S5. 3D images of TEX14 antibody-stained intercellular bridges and the models of these bridges observed in E14.5 *Tex14* heterozygous mutant ovaries. (A, B) Ring-shaped intercellular bridges. (C-F) Fragmented intercellular bridges. (N=6 ovaries were examined).**

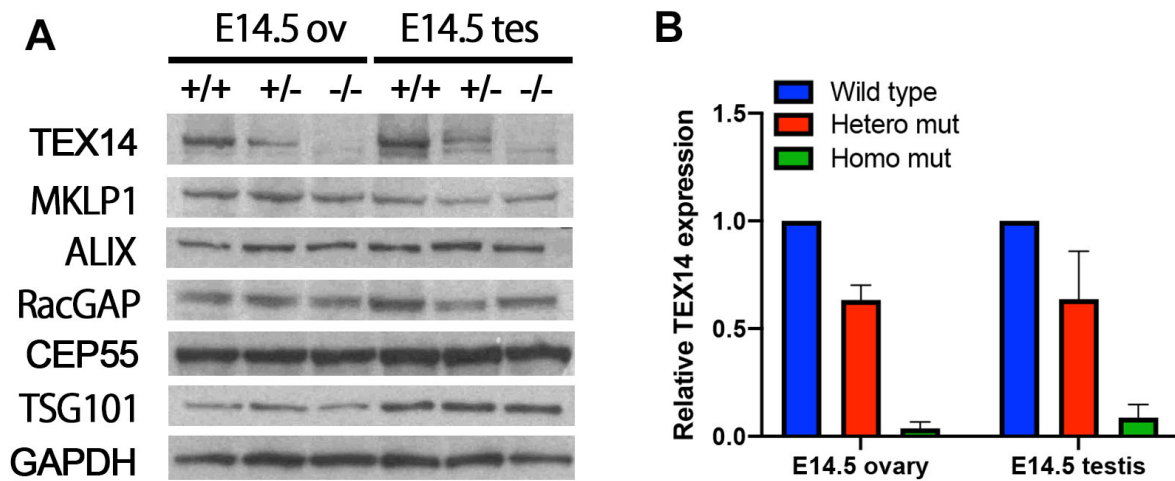

**Fig S6. The expression of cytokinesis proteins.** (A) The expression of TEX14, MKLP1, ALIX, RacGAP, CEP55 and TSG101 in E14.5 wild type (+/+), heterozygous mutant (+/-) and homozygous mutant (-/-) gonads examined by western blot. N=40 gonads of each genotype were pooled for each western blot sample. N=3 experiments were conducted. (B) The relative protein level of TEX14 in E14.5 wild type and mutant gonads. Error bars present standard deviations

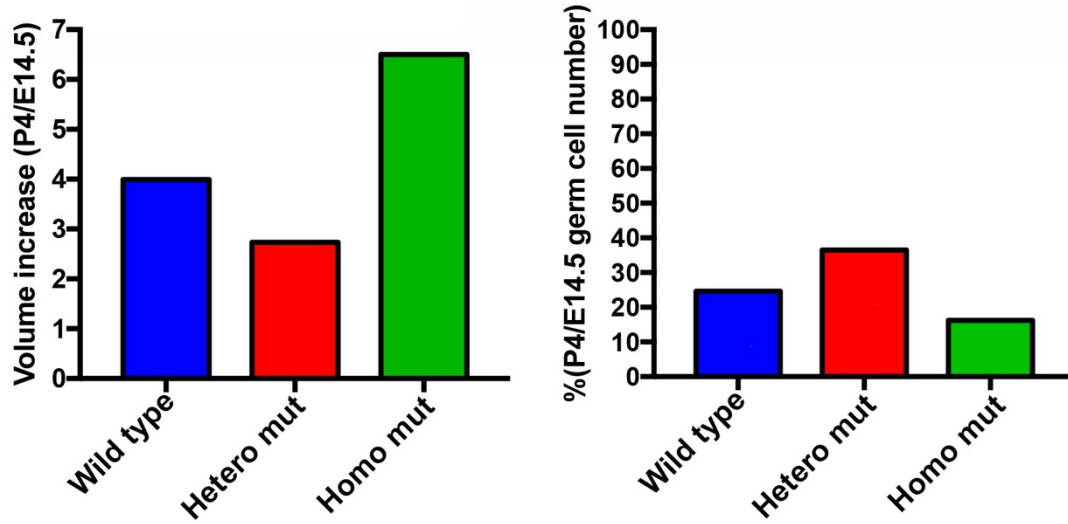

**Fig S7.** The fold of germ cell volume increase from E14.5 to P4 and the percentage of E14.5 germ cells differentiate into primary oocytes. N=6 ovaries (approximately 100 germ cells/ovary) at each time point were used for germ cell volume analyses. Total number of the germ cells per ovary at each time point were used for germ cell number analyses.

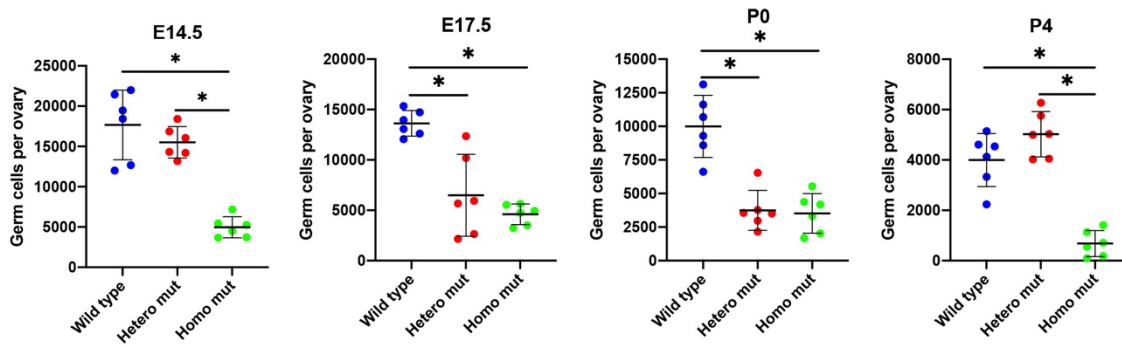

**Fig S8. Number of germ cells in the fetal ovary during oocyte differentiation.** N=6 ovaries at each time point were used for analyses. One-way ANOVA was used for statistical analyses, \* indicates significant difference with P value <0.05. Error bars present standard deviations.



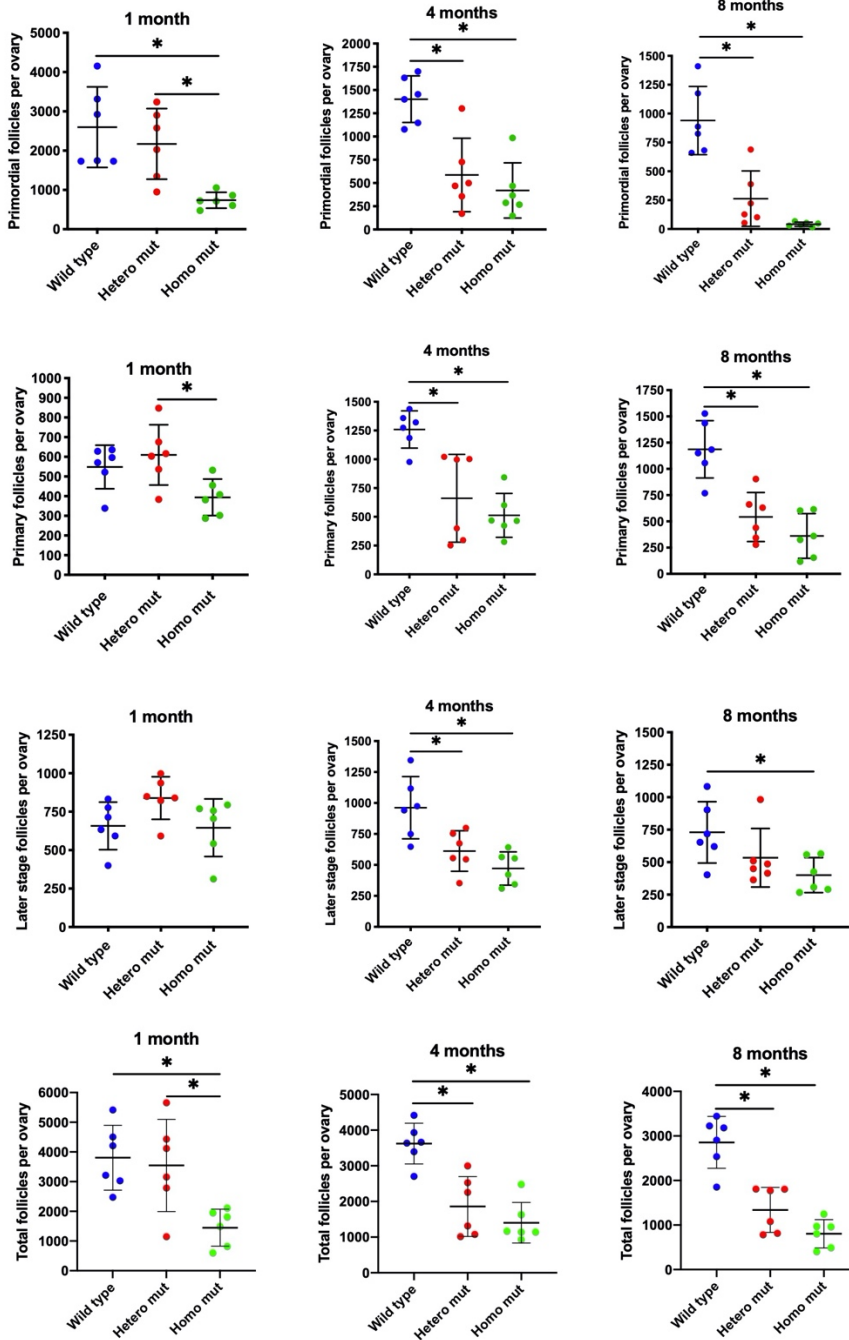

**Fig S9. Number of follicles in the adult ovary from 1 month to 8 months.** N=6 ovaries at each time point were used for analyses. One-way ANOVA was used for statistical analyses, \* indicates significant difference with P value <0.05. Error bars present standard deviations.

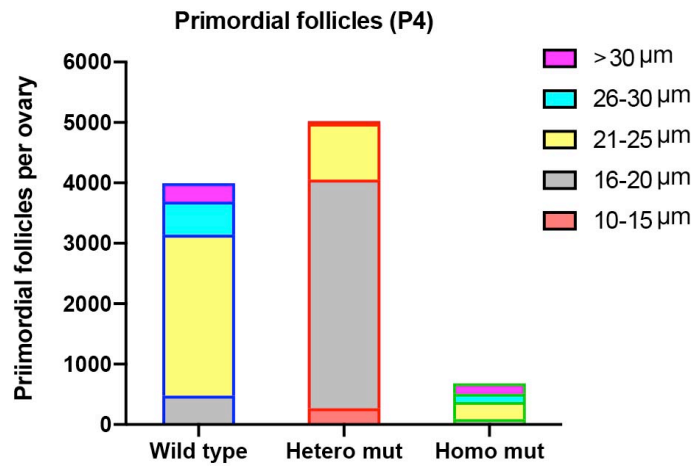

**Fig S10. Proportion of primary oocytes based on cell diameter ( $\text{prop}_{\text{oocyte size}}$ ) in the ovarian reserve of P4 ovaries.** The percentage of primary oocytes at each size range ( $\text{percentage}_{\text{oocyte size}}$ ) was calculated based on germ cell diameter measurements in P4 ovaries (Fig 3H). The  $\text{prop}_{\text{oocyte size}} = \text{average number of primordial follicles per ovary} \times \text{percentage}_{\text{oocyte size}}$  at each size range.

**Table S1. Antibodies used in the manuscript.**

| Antibodies              | Vendors and antibody validation profile                                                                                                                                                                                                                                                                                                                                              | Dilution                  |
|-------------------------|--------------------------------------------------------------------------------------------------------------------------------------------------------------------------------------------------------------------------------------------------------------------------------------------------------------------------------------------------------------------------------------|---------------------------|
| TEX14                   | Protein Tech (18351-1-AP; Lot# was not provided by the vendor)<br><a href="https://www.ptglab.com/products/TEX14-Antibody-18351-1-AP.htm">https://www.ptglab.com/products/TEX14-Antibody-18351-1-AP.htm</a>                                                                                                                                                                          | 1:200 (IF)<br>1:1000 (WB) |
| RacGAP1 (A-6)           | Santa Cruz Biotechnology (sc 271110; Lot# F0612)<br><a href="https://www.scbt.com/p/rac-gap1-antibody-a-6?requestFrom=search">https://www.scbt.com/p/rac-gap1-antibody-a-6?requestFrom=search</a>                                                                                                                                                                                    | 1:100                     |
| GM130                   | BD Biosciences (610822; Lot# 7163678)<br><a href="https://www.bdbiosciences.com/us/reagents/research/antibodies-buffers/cell-biology-reagents/cell-biology-antibodies/purified-mouse-anti-gm130-35gm130/p/610822">https://www.bdbiosciences.com/us/reagents/research/antibodies-buffers/cell-biology-reagents/cell-biology-antibodies/purified-mouse-anti-gm130-35gm130/p/610822</a> | 1:100                     |
| MVH                     | Abcam (ab13840; Lot# GR3218256)<br><a href="https://www.abcam.com/ddx4--mvh-antibody-ab13840.html">https://www.abcam.com/ddx4--mvh-antibody-ab13840.html</a>                                                                                                                                                                                                                         | 1:200                     |
| Sodium Potassium ATPase | Abcam (ab76020; Lot# GR3184452-3)<br><a href="https://www.abcam.com/sodium-potassium-atpase-antibody-ep1845y-plasma-membrane-loading-control-ab76020.html">https://www.abcam.com/sodium-potassium-atpase-antibody-ep1845y-plasma-membrane-loading-control-ab76020.html</a>                                                                                                           | 1:200                     |
| TRA98                   | B-Bridge (73-003; Lot# 170819B)<br><a href="https://www.asone-int.com/wp-content/uploads/2017/05/73-003_73-003_Datasheet.pdf">https://www.asone-int.com/wp-content/uploads/2017/05/73-003_73-003_Datasheet.pdf</a>                                                                                                                                                                   | 1:500                     |
| Cleaved Parp (Asp214)   | Cell Signaling (94885S; Lot# 1)<br><a href="https://www.cellsignal.com/products/primary-antibodies/cleaved-parp-asp214-d6x6x-rabbit-mab-rodent-specific/94885?Ntk=Products&amp;Ntt=94885">https://www.cellsignal.com/products/primary-antibodies/cleaved-parp-asp214-d6x6x-rabbit-mab-rodent-specific/94885?Ntk=Products&amp;Ntt=94885</a>                                           | 1:200                     |
| GFP                     | Aves Labs (GFP-1020; Lot# GFP697986)<br><a href="https://www.aveslabs.com/products/green-fluorescent-protein-gfp-antibody?_pos=1&amp;_sid=8140431bd&amp;_ss=r">https://www.aveslabs.com/products/green-fluorescent-protein-gfp-antibody?_pos=1&amp;_sid=8140431bd&amp;_ss=r</a>                                                                                                      | 1:1000                    |
| EdU (labeling kit)      | Invitrogen (C10337; Lot# 1741650)<br><a href="https://www.thermofisher.com/order/catalog/product/C10337#/C10337">https://www.thermofisher.com/order/catalog/product/C10337#/C10337</a>                                                                                                                                                                                               | 1:200 for EdU incubation  |
| SCP3                    | Abcam (ab15092; Lot# 823899)<br>LEI, L. & SPRADLING, A. C. 2013b. Mouse primordial germ cells produce cysts that partially fragment prior to meiosis. <i>Development</i> , 140, 2075-81.                                                                                                                                                                                             | 1:200                     |
| MKLP1                   | Santa Cruz Biotechnology (sc-867; Lot# B2310)<br><a href="https://www.scbt.com/p/mklp-1-antibody-n-19?requestFrom=search">https://www.scbt.com/p/mklp-1-antibody-n-19?requestFrom=search</a>                                                                                                                                                                                         | 1:500                     |
| ALIX                    | BioLegend (634502; Lot# was not provided by the vendor)<br><a href="https://www.biolegend.com/en-us/products/purified-anti-alix-antibody-4469">https://www.biolegend.com/en-us/products/purified-anti-alix-antibody-4469</a>                                                                                                                                                         | 1:500                     |

|         |                                                                                                                                                                                                                                                                                                                                                                                                                    |         |
|---------|--------------------------------------------------------------------------------------------------------------------------------------------------------------------------------------------------------------------------------------------------------------------------------------------------------------------------------------------------------------------------------------------------------------------|---------|
| RacGAP1 | Protein Tech (13739-1-AP; Lot# was not provided by the vendor)<br><a href="https://www.ptglab.com/products/RACGAP1-Antibody-13739-1-AP.htm">https://www.ptglab.com/products/RACGAP1-Antibody-13739-1-AP.htm</a>                                                                                                                                                                                                    | 1:500   |
| CEP55   | Abcam (ab170414; Lot# GR128676)<br><a href="https://www.abcam.com/cep55-antibody-epr11944b-ab170414.html">https://www.abcam.com/cep55-antibody-epr11944b-ab170414.html</a>                                                                                                                                                                                                                                         | 1:500   |
| TSG101  | Santa Cruz Biotechnology (sc-7964; Lot# H1319)<br><a href="https://www.scbt.com/p/tsg-101-antibody-c-2?requestFrom=search">https://www.scbt.com/p/tsg-101-antibody-c-2?requestFrom=search</a>                                                                                                                                                                                                                      | 1:500   |
| GAPDH   | Cell Signaling (5174; Lot# 7)<br><a href="https://www.cellsignal.com/products/primary-antibodies/gapdh-d16h11-xp-rabbit-mab/5174?Ntk=Products&amp;site-search-type=Products&amp;N=4294956287&amp;Ntt=gapdh&amp;fromPage=plp">https://www.cellsignal.com/products/primary-antibodies/gapdh-d16h11-xp-rabbit-mab/5174?Ntk=Products&amp;site-search-type=Products&amp;N=4294956287&amp;Ntt=gapdh&amp;fromPage=plp</a> | 1:10000 |
